# Supplementary material
Source: PubMed Central journal article supplement (PMC5814127)
Supplement: NIHMS940636-supplement-erratum.pdf [file NIHMS940636-supplement-erratum.pdf]

## Corrections to Errors found in McKay et al.

Abstract:

*Results:* Clients.... follow-up. Of these relapsed clients, 70.1% were retained or re-engaged in MyFYR, and of these, half were able to re-establish abstinence of two months duration or more, as documented by urine toxicology.

### Results Section:

#### 3.3. Substance use Outcomes

(second paragraph) Out of the 198 study participants, 51 had one or more positive test results. Of those, 21 (41.2%) tested positive only once, 19 (37.3%) had two positive urines, and 11 (21.6%) had three or more positive urines. Alcohol (41.0%) and opiates (28.0%) were the primary drugs that individuals relapsed on based on urinalysis results. Of the 107 individuals who relapsed at some point, 60 (56.1%) had no positive urine samples but self-reported one or more episodes of alcohol or drug use, or acknowledged use that was reported by a family member. Individuals who relapsed were significantly more likely to have an alcohol use disorder diagnosis at intake ( $X^2 = 8.0$ ;  $p < .01$ ). None of the other variables examined (e.g., gender, age, length of inpatient treatment, use of substances other than alcohol, use of multiple substances, or presence of a co-occurring psychiatric disorder) predicted relapse status during the follow-up.

#### 3.4. Relation of Program Completion to Substance Use Outcomes

Individuals who completed MyFYR were significantly more likely to be abstinent during their stay in the program than individuals who dropped out (50.7% versus 31.8%;  $X^2 = 4.87$ ;  $p < .04$ ). The 107 individuals who relapsed were examined in more detail. Of those participants, 75 (70.1%) remained engaged in the MyFYR program after relapse and completed the program.

### 4. Discussion

(4<sup>th</sup> paragraph) Third, it appears that the procedures in place in MyFYR facilitated ongoing contact with many clients and their families during and following relapse episodes, and that a significant number of these clients were able to re-establish abstinence following their relapses. About 70% of the clients who relapsed either remained engaged in MyFYR or were quickly re-engaged after a period of no contact, and half of these clients were able to re-establish abstinence following their relapses, with a mean duration of almost six months of abstinence.
